# Supplementary material for: Synthesis of novel heterobimetallic copper(i) hydrazone Schiff base complexes: A comparative study on the effect of heterocyclic hydrazides towards interaction with DNA/protein, free radical scavenging and cytotoxicity
Source: Royal Society of Chemistry journal article supplement (doi:10.1039/c2mt00004k), 2012-01-01
Supplement: c2mt00004k.pdf [file c2mt00004k.pdf]

## Supplementary material for

# Synthesis of novel heterobimetallic copper(I) hydrazone Schiff base complexes: A comparative study on the effect of heterocyclic hydrazides towards interaction with DNA/protein, free radical scavenging and cytotoxicity

Palanisamy Sathyadevi <sup>a</sup>, Paramasivam Krishnamoorthy <sup>a</sup>, Rachel R. Butorac <sup>b</sup>,  
Alan H. Cowley <sup>b</sup> and Nallasamy Dharmaraj <sup>a,\*</sup>

<sup>a</sup> Department of Chemistry, Bharathiar University, Coimbatore – 641 046, India

E-mail address: dharmaraj@buc.edu.in; Tel.: +91 422 2428316; Fax: +91 422 2422387

<sup>b</sup> Department of Chemistry and Biochemistry, University of Texas at Austin, Austin, Texas  
78712, USA

## Figures

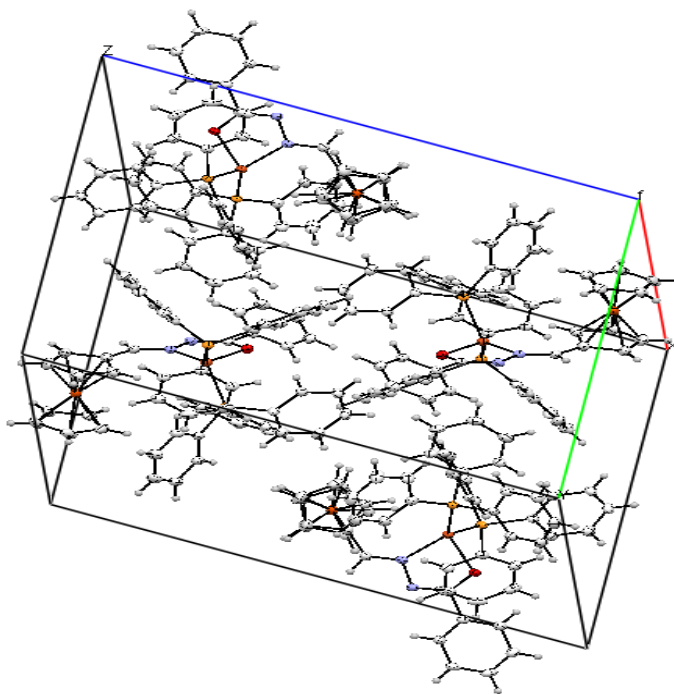

**Figure S1.** Unit cell packing diagram of the complex **4**.

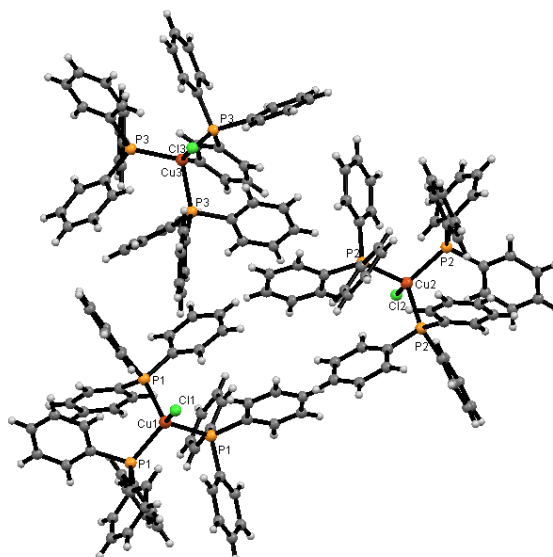

**Figure S2.** Molecular structure of the complex **4a** showing the atom-numbering scheme with thermal ellipsoids at 25% probability level.

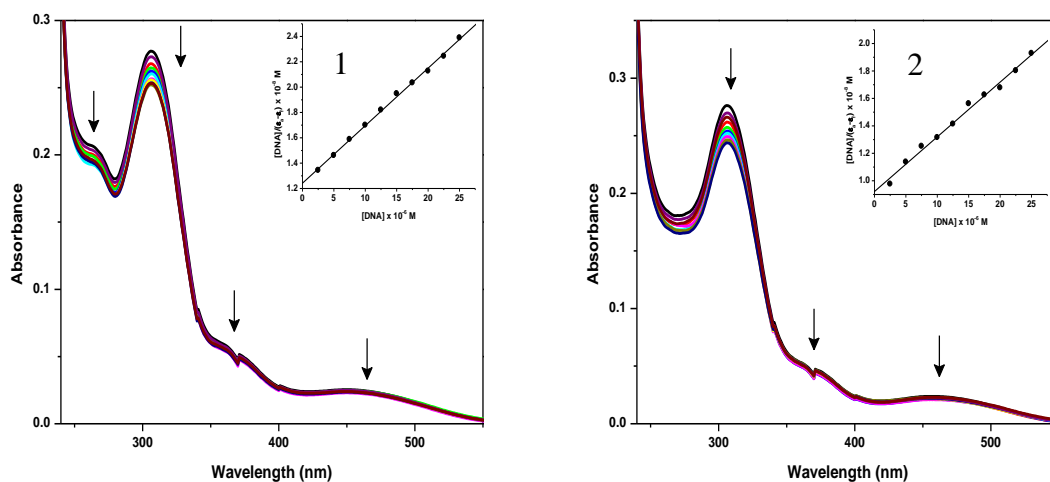

**Figure S3.** Electronic absorption spectra of ligands **1** and **2** (25  $\mu\text{M}$ ) in the absence and presence of increasing amounts of CT DNA (2.5, 5.0, 7.5, 10.0, 12.5, 15.0, 17.5 and 20.0, 22.5 and 25  $\mu\text{M}$ ). Arrows show the changes in absorbance with respect to an increase in the DNA concentration.

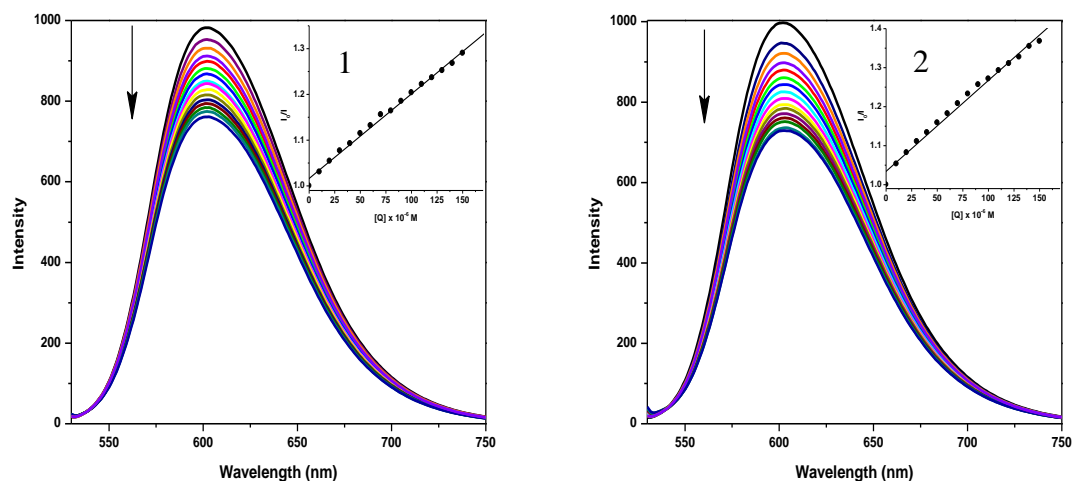

**Figure S4.** Emission spectra of DNA-EB (5  $\mu\text{M}$ ), in the presence of 0, 10, 20, 30, 40, 50, 60, 70, 80, 90, 100, 110, 120, 130, 149 and 150  $\mu\text{M}$  of ligands **1** and **2**. Arrow indicates the changes in the emission intensity as a function of compound concentration. Inset: Stern-Volmer plot of the fluorescence titration data corresponding to the compounds.

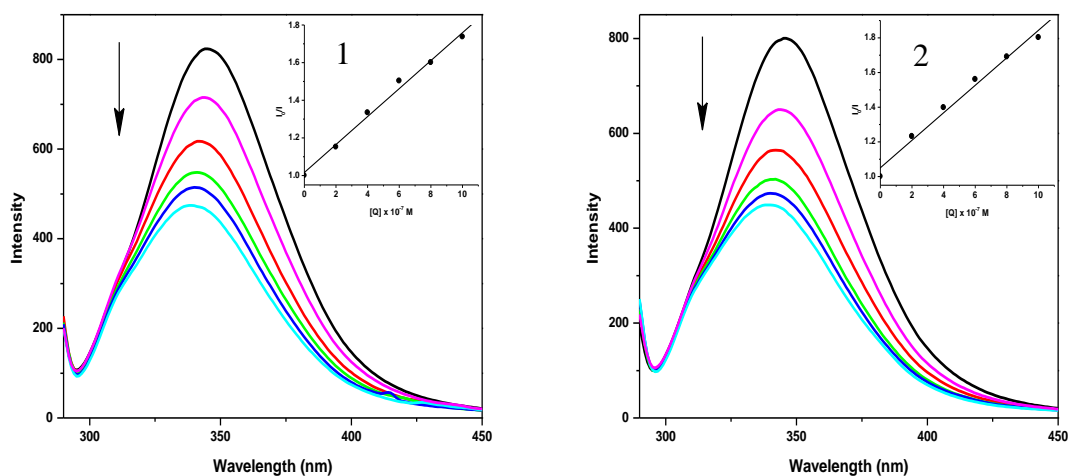

**Figure S5.** Emission spectra of BSA ( $1 \times 10^{-6}$  M;  $\lambda_{\text{exi}} = 280$  nm;  $\lambda_{\text{emi}} = 345$  nm) as a function of concentration of ligands **1** and **2** ( $0, 2, 4, 6, 8$  and  $10 \times 10^{-7}$  M). Arrow indicates the effect of ligands on the fluorescence emission of BSA

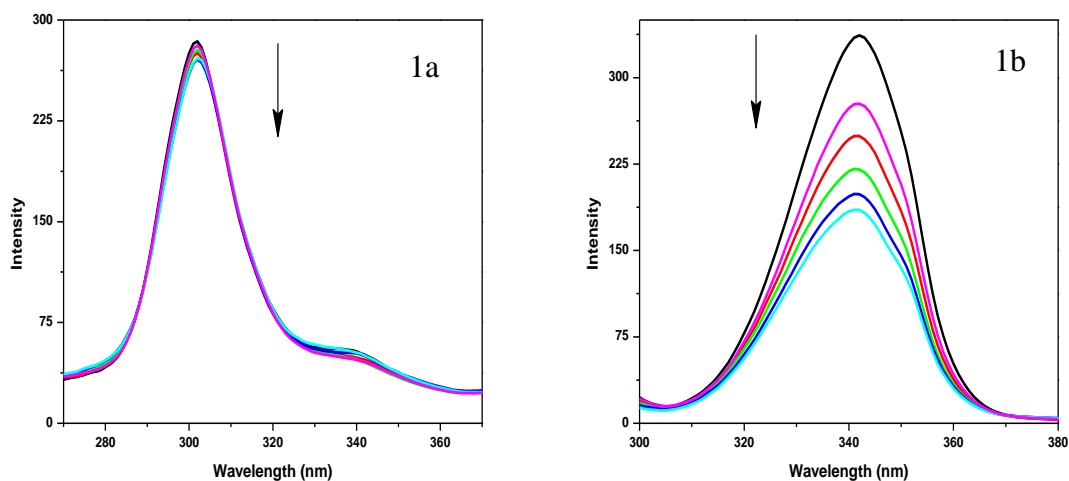

**Figure S6.** Synchronous spectra of BSA ( $1 \times 10^{-6}$  M) as a function of concentration of the ligands **1** ( $0, 2, 4, 6, 8$  and  $10 \times 10^{-7}$  M) with wavelength difference of  $\Delta\lambda = 15$  nm (a) and  $\Delta\lambda = 60$  nm (b). Arrow indicates the changes in emission intensity w.r.t various concentration of ligand.

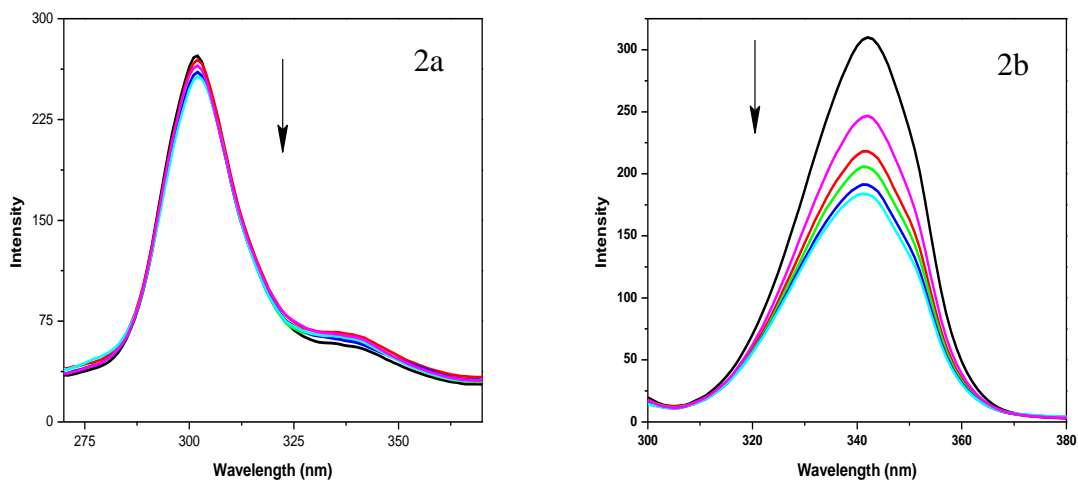

**Figure S7.** Synchronous spectra of BSA ( $1 \times 10^{-6}$  M) as a function of concentration of the ligand **2** (0, 2, 4, 6, 8 and  $10 \times 10^{-7}$  M) with wavelength difference of  $\Delta\lambda = 15$  nm (a) and  $\Delta\lambda = 60$  nm (b). Arrow indicates the changes in emission intensity w.r.t various concentration of ligand.
